# Supplementary material for: High Expression of XRCC6 Promotes Human Osteosarcoma Cell Proliferation through the β-Catenin/Wnt Signaling Pathway and Is Associated with Poor Prognosis
Source: MDPI journal article supplement (doi:10.3390/ijms17071188), 2016-07-22
Supplement: s1 [file s1]

# Supplementary Materials: High Expression of XRCC6 Promotes Human Osteosarcoma Cell Proliferation Through the $\beta$ -Catenin/Wnt Signaling Pathway and Is Associated with Poor Prognosis

Bin Zhu, Dongdong Cheng, Shijie Li, Shumin Zhou and Qingcheng Yang

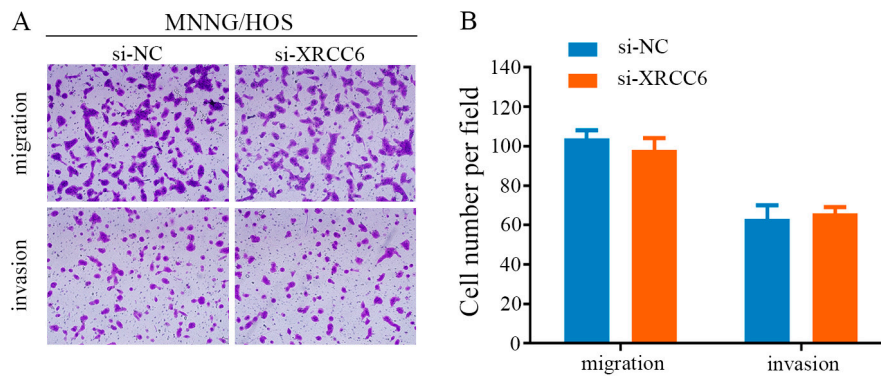

**Figure S1.** Knockdown of XRCC6 expression did not significantly influence migration or invasion of OS cells. (A,B) Transwell migration and invasion assays for MNNG/HOS were determined after transduction with si-NC or si-XRCC6 (Migration: 40 $\times$ ).

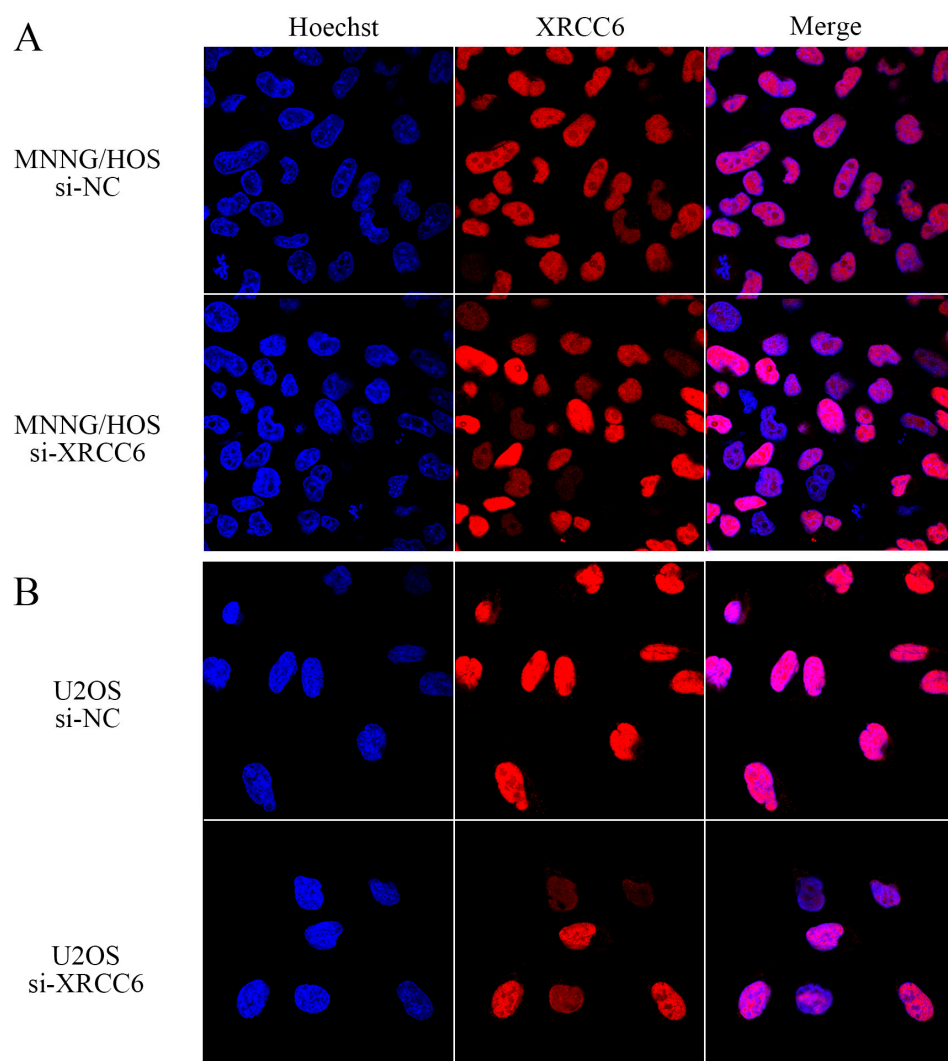

**Figure S2.** The expression of XRCC6 was down regulated by a targeted siRNA. (A,B) The expression of XRCC6 was detected using immunofluorescence on MNNG/HOS (A) and U2OS (B) cells after transfected with si-NC or si-XRCC6 (Magnification: 200 $\times$ ).
